# Supplementary material for: Effectiveness of BNT162b2 BA.4/5 Bivalent COVID-19 Vaccine against Long COVID Symptoms: A US Nationwide Study
Source: MDPI journal article supplement (doi:10.3390/vaccines12020183), 2024-02-11
Supplement: s1 [file s1]

## Effectiveness of BNT162b2 BA.4/5 bivalent COVID-19 vaccine against long COVID

### symptoms: a US nationwide study

#### Supplemental Material

Supplemental Table S1. Trajectory of Long COVID Symptoms at 1-, 3- and 6-month follow-up

|                                                                                                       | All         | BNT162b2   | Unvaccinated | P <sup>a</sup> | P <sup>b</sup> |
|-------------------------------------------------------------------------------------------------------|-------------|------------|--------------|----------------|----------------|
| <b>Week 4</b>                                                                                         |             |            |              |                |                |
| n                                                                                                     | 505         | 260        | 245          |                |                |
| Mean (SD)                                                                                             | 2.6 (3.1)   | 2.4 (3.0)  | 2.9 (3.2)    | 0.076          |                |
| ≥3 symptoms                                                                                           | 150 (29.7%) | 63 (24.2%) | 87 (35.5%)   | 0.006          | 0.015          |
| General symptoms                                                                                      |             |            |              |                |                |
| ≥1 symptom                                                                                            | 171 (33.8%) | 75 (28.8%) | 96 (39.0%)   | 0.016          | 0.069          |
| Tiredness or fatigue that interferes with daily life                                                  | 123 (24.4%) | 46 (17.7%) | 77 (31.4%)   | 0.000          | 0.002          |
| Symptoms that get worse after physical or mental activities (also known as “post-exertional malaise”) | 53 (10.5%)  | 30 (11.5%) | 23 (9.4%)    | 0.431          | 0.335          |
| Fever                                                                                                 | 5 (1.0%)    | 2 (0.8%)   | 3 (1.2%)     | 0.606          | -              |
| General pain/discomfort                                                                               | 42 (8.3%)   | 18 (6.9%)  | 24 (9.8%)    | 0.243          | 0.313          |
| Chills                                                                                                | 6 (1.2%)    | 3 (1.2%)   | 3 (1.2%)     | 0.942          | 0.960          |
| Exercise intolerance                                                                                  | 61 (12.1%)  | 34 (13.1%) | 27 (11.0%)   | 0.479          | 0.285          |
| Respiratory and cardiac                                                                               |             |            |              |                |                |
| ≥1 symptom                                                                                            | 150 (29.6%) | 66 (25.4%) | 84 (34.1%)   | 0.031          | 0.059          |
| Difficulty breathing or shortness of breath                                                           | 50 (9.9%)   | 22 (8.5%)  | 28 (11.4%)   | 0.265          | 0.488          |
| Cough                                                                                                 | 93 (18.4%)  | 43 (16.5%) | 50 (20.4%)   | 0.262          | 0.133          |
| Chest pain                                                                                            | 11 (2.2%)   | 5 (1.9%)   | 6 (2.5%)     | 0.686          | 0.697          |
| Sore throat                                                                                           | 21 (4.2%)   | 6 (2.3%)   | 15 (6.1%)    | 0.032          | 0.025          |
| Fast-beating or pounding heart (also known as heart palpitations)                                     | 34 (6.7%)   | 14 (5.4%)  | 20 (8.2%)    | 0.213          | 0.375          |
| Neurologic                                                                                            |             |            |              |                |                |
| ≥1 symptom                                                                                            | 190 (37.5%) | 86 (33.1%) | 104 (42.3%)  | 0.033          | 0.035          |
| Difficulty thinking or concentrating (sometimes referred to as “brain fog”)                           | 101 (20.0%) | 50 (19.2%) | 51 (20.8%)   | 0.656          | 0.944          |
| Headache                                                                                              | 67 (13.3%)  | 30 (11.5%) | 37 (15.1%)   | 0.238          | 0.309          |
| Sleep problems                                                                                        | 53 (10.5%)  | 23 (8.9%)  | 30 (12.2%)   | 0.213          | 0.228          |
| Dizziness when you stand up (lightheadedness)                                                         | 42 (8.3%)   | 20 (7.7%)  | 22 (9.0%)    | 0.601          | 0.597          |
| Vertigo                                                                                               | 10 (2.0%)   | 3 (1.2%)   | 7 (2.9%)     | 0.170          | 0.189          |
| Pins-and-needles feeling                                                                              | 21 (4.2%)   | 7 (2.7%)   | 14 (5.7%)    | 0.089          | 0.155          |
| Change in smell or taste                                                                              | 36 (7.1%)   | 15 (5.8%)  | 21 (8.6%)    | 0.221          | 0.081          |

|                                                                                                       |             |            |            |       |       |
|-------------------------------------------------------------------------------------------------------|-------------|------------|------------|-------|-------|
| Mood changes                                                                                          | 32 (6.3%)   | 14 (5.4%)  | 18 (7.4%)  | 0.366 | 0.696 |
| Memory loss                                                                                           | 29 (5.7%)   | 16 (6.2%)  | 13 (5.3%)  | 0.682 | 0.486 |
| Confusion                                                                                             | 19 (3.8%)   | 10 (3.9%)  | 9 (3.7%)   | 0.919 | 0.780 |
| Depression or anxiety                                                                                 | 45 (8.9%)   | 18 (6.9%)  | 27 (11.0%) | 0.106 | 0.251 |
| Digestive and Other                                                                                   |             |            |            |       |       |
| ≥1 symptom                                                                                            | 108 (21.4%) | 50 (19.2%) | 58 (23.7%) | 0.224 | 0.445 |
| Diarrhea                                                                                              | 15 (3.0%)   | 5 (1.9%)   | 10 (4.1%)  | 0.153 | 0.388 |
| Stomach pain                                                                                          | 15 (3.0%)   | 5 (1.9%)   | 10 (4.1%)  | 0.153 | 0.434 |
| Nausea with or without vomiting                                                                       | 18 (3.6%)   | 7 (2.7%)   | 11 (4.5%)  | 0.276 | 0.286 |
| Loss of appetite                                                                                      | 18 (3.6%)   | 8 (3.1%)   | 10 (4.1%)  | 0.543 | 0.556 |
| Joint or muscle pain                                                                                  | 42 (8.3%)   | 17 (6.5%)  | 25 (10.2%) | 0.136 | 0.057 |
| Rash                                                                                                  | 5 (1.0%)    | 2 (0.8%)   | 3 (1.2%)   | 0.606 | 0.253 |
| Changes in menstrual cycles                                                                           | 22 (8.6%)   | 12 (11.5%) | 10 (6.6%)  | 0.164 | 0.172 |
| Hair loss                                                                                             | 25 (5.0%)   | 10 (3.9%)  | 15 (6.1%)  | 0.239 | 0.489 |
|                                                                                                       |             |            |            |       |       |
| <b>Month 3</b>                                                                                        |             |            |            |       |       |
| n                                                                                                     | 470         | 244        | 226        |       |       |
| Mean (SD)                                                                                             | 2.4 (3.1)   | 2.1 (2.4)  | 2.8 (3.7)  | 0.028 |       |
| ≥3 symptoms                                                                                           | 113 (24.0%) | 52 (21.3%) | 61 (27.0%) | 0.150 | 0.318 |
| General symptoms                                                                                      |             |            |            |       |       |
| ≥1 symptom                                                                                            | 123 (26.1%) | 51 (20.9%) | 72 (31.7%) | 0.008 | 0.036 |
| Tiredness or fatigue that interferes with daily life                                                  | 92 (19.6%)  | 36 (14.8%) | 56 (24.8%) | 0.006 | 0.016 |
| Symptoms that get worse after physical or mental activities (also known as “post-exertional malaise”) | 33 (7.0%)   | 17 (7.0%)  | 16 (7.1%)  | 0.962 | 0.910 |
| Fever                                                                                                 | 3 (0.6%)    | 0 (0.0%)   | 3 (1.3%)   | 0.071 | -     |
| General pain/discomfort                                                                               | 38 (8.1%)   | 18 (7.4%)  | 20 (8.9%)  | 0.559 | 0.725 |
| Chills                                                                                                | 6 (1.3%)    | 1 (0.4%)   | 5 (2.2%)   | 0.082 | 0.191 |
| Exercise intolerance                                                                                  | 40 (8.5%)   | 19 (7.8%)  | 21 (9.3%)  | 0.559 | 0.935 |
| Respiratory and cardiac                                                                               |             |            |            |       |       |
| ≥1 symptom                                                                                            | 76 (16.1%)  | 38 (15.6%) | 38 (16.7%) | 0.731 | 0.990 |
| Difficulty breathing or shortness of breath                                                           | 33 (7.0%)   | 14 (5.7%)  | 19 (8.4%)  | 0.258 | 0.569 |
| Cough                                                                                                 | 35 (7.5%)   | 18 (7.4%)  | 17 (7.5%)  | 0.952 | 0.764 |
| Chest pain                                                                                            | 9 (1.9%)    | 3 (1.2%)   | 6 (2.7%)   | 0.260 | 0.276 |
| Sore throat                                                                                           | 13 (2.8%)   | 2 (0.8%)   | 11 (4.9%)  | 0.008 | 0.029 |
| Fast-beating or pounding heart (also known as heart palpitations)                                     | 24 (5.1%)   | 12 (4.9%)  | 12 (5.3%)  | 0.847 | 0.864 |
| Neurologic                                                                                            |             |            |            |       |       |
| ≥1 symptom                                                                                            | 165 (35.0%) | 77 (31.6%) | 88 (38.8%) | 0.101 | 0.167 |
| Difficulty thinking or concentrating (sometimes referred to as “brain fog”)                           | 74 (15.7%)  | 34 (13.9%) | 40 (17.7%) | 0.263 | 0.511 |
| Headache                                                                                              | 49 (10.4%)  | 17 (7.0%)  | 32 (14.2%) | 0.011 | 0.051 |

|                                                                                                       |             |            |            |       |       |
|-------------------------------------------------------------------------------------------------------|-------------|------------|------------|-------|-------|
| Sleep problems                                                                                        | 56 (11.9%)  | 25 (10.2%) | 31 (13.7%) | 0.246 | 0.300 |
| Dizziness when you stand up (lightheadedness)                                                         | 34 (7.2%)   | 17 (7.0%)  | 17 (7.5%)  | 0.817 | 0.870 |
| Vertigo                                                                                               | 15 (3.2%)   | 5 (2.1%)   | 10 (4.4%)  | 0.143 | 0.215 |
| Pins-and-needles feeling                                                                              | 20 (4.3%)   | 5 (2.1%)   | 15 (6.6%)  | 0.014 | 0.050 |
| Change in smell or taste                                                                              | 19 (4.0%)   | 8 (3.3%)   | 11 (4.9%)  | 0.382 | 0.267 |
| Mood changes                                                                                          | 34 (7.2%)   | 10 (4.1%)  | 24 (10.6%) | 0.006 | 0.024 |
| Memory loss                                                                                           | 30 (6.4%)   | 13 (5.3%)  | 17 (7.5%)  | 0.331 | 0.665 |
| Confusion                                                                                             | 18 (3.8%)   | 7 (2.9%)   | 11 (4.9%)  | 0.259 | 0.344 |
| Depression or anxiety                                                                                 | 50 (10.6%)  | 18 (7.4%)  | 32 (14.2%) | 0.017 | 0.079 |
| Digestive and Other                                                                                   |             |            |            |       |       |
| ≥1 symptom                                                                                            | 109 (23.1%) | 55 (22.5%) | 54 (23.8%) | 0.748 | 0.907 |
| Diarrhea                                                                                              | 15 (3.2%)   | 4 (1.6%)   | 11 (4.9%)  | 0.047 | 0.184 |
| Stomach pain                                                                                          | 14 (3.0%)   | 3 (1.2%)   | 11 (4.9%)  | 0.021 | 0.047 |
| Nausea with or without vomiting                                                                       | 12 (2.6%)   | 5 (2.1%)   | 7 (3.1%)   | 0.472 | 0.528 |
| Loss of appetite                                                                                      | 12 (2.6%)   | 6 (2.5%)   | 6 (2.7%)   | 0.893 | 0.917 |
| Joint or muscle pain                                                                                  | 39 (8.3%)   | 22 (9.0%)  | 17 (7.5%)  | 0.557 | 0.757 |
| Rash                                                                                                  | 9 (1.9%)    | 5 (2.1%)   | 4 (1.8%)   | 0.825 | 0.957 |
| Changes in menstrual cycles                                                                           | 27 (11.1%)  | 12 (12.0%) | 15 (10.5%) | 0.712 | 0.758 |
| Hair loss                                                                                             | 30 (6.4%)   | 14 (5.7%)  | 16 (7.1%)  | 0.552 | 0.983 |
|                                                                                                       |             |            |            |       |       |
| <b>Month 6</b>                                                                                        |             |            |            |       |       |
| n                                                                                                     | 444         | 233        | 211        |       |       |
| Mean (SD)                                                                                             | 2.2 (2.6)   | 2.0 (2.5)  | 2.4 (2.7)  | 0.115 |       |
| ≥3 symptoms                                                                                           | 96 (21.6%)  | 40 (17.2%) | 56 (26.5%) | 0.017 | 0.034 |
| General symptoms                                                                                      |             |            |            |       |       |
| ≥1 symptom                                                                                            | 107 (24.0%) | 46 (19.6%) | 61 (28.9%) | 0.021 | 0.048 |
| Tiredness or fatigue that interferes with daily life                                                  | 82 (18.5%)  | 32 (13.7%) | 50 (23.7%) | 0.007 | 0.013 |
| Symptoms that get worse after physical or mental activities (also known as “post-exertional malaise”) | 31 (7.0%)   | 21 (9.0%)  | 10 (4.7%)  | 0.078 | 0.080 |
| Fever                                                                                                 | 2 (0.5%)    | 1 (0.4%)   | 1 (0.5%)   | 0.944 | -     |
| General pain/discomfort                                                                               | 31 (7.0%)   | 16 (6.9%)  | 15 (7.1%)  | 0.920 | 0.958 |
| Chills                                                                                                | 3 (0.7%)    | 2 (0.9%)   | 1 (0.5%)   | 0.621 | 0.497 |
| Exercise intolerance                                                                                  | 28 (6.3%)   | 15 (6.4%)  | 13 (6.2%)  | 0.905 | 0.700 |
| Respiratory and cardiac                                                                               |             |            |            |       |       |
| ≥1 symptom                                                                                            | 62 (13.9%)  | 29 (12.3%) | 33 (15.6%) | 0.315 | 0.424 |
| Difficulty breathing or shortness of breath                                                           | 26 (5.9%)   | 11 (4.7%)  | 15 (7.1%)  | 0.285 | 0.625 |
| Cough                                                                                                 | 22 (5.0%)   | 11 (4.7%)  | 11 (5.2%)  | 0.811 | 0.579 |
| Chest pain                                                                                            | 7 (1.6%)    | 1 (0.4%)   | 6 (2.8%)   | 0.041 | 0.078 |
| Sore throat                                                                                           | 13 (2.9%)   | 7 (3.0%)   | 6 (2.8%)   | 0.920 | 0.984 |

|                                                                             |             |            |            |       |       |
|-----------------------------------------------------------------------------|-------------|------------|------------|-------|-------|
| Fast-beating or pounding heart (also known as heart palpitations)           | 21 (4.7%)   | 10 (4.3%)  | 11 (5.2%)  | 0.648 | 0.885 |
| Neurologic                                                                  |             |            |            |       |       |
| ≥1 symptom                                                                  | 139 (31.2%) | 61 (26.0%) | 78 (37.0%) | 0.012 | 0.018 |
| Difficulty thinking or concentrating (sometimes referred to as “brain fog”) | 73 (16.4%)  | 34 (14.6%) | 39 (18.5%) | 0.269 | 0.426 |
| Headache                                                                    | 38 (8.6%)   | 15 (6.4%)  | 23 (10.9%) | 0.093 | 0.137 |
| Sleep problems                                                              | 51 (11.5%)  | 22 (9.4%)  | 29 (13.7%) | 0.156 | 0.168 |
| Dizziness when you stand up (lightheadedness)                               | 29 (6.5%)   | 15 (6.4%)  | 14 (6.6%)  | 0.933 | 0.860 |
| Vertigo                                                                     | 14 (3.2%)   | 5 (2.2%)   | 9 (4.3%)   | 0.202 | 0.223 |
| Pins-and-needles feeling                                                    | 16 (3.6%)   | 6 (2.6%)   | 10 (4.7%)  | 0.222 | 0.241 |
| Change in smell or taste                                                    | 15 (3.4%)   | 5 (2.2%)   | 10 (4.7%)  | 0.131 | 0.109 |
| Mood changes                                                                | 18 (4.1%)   | 6 (2.6%)   | 12 (5.7%)  | 0.097 | 0.140 |
| Memory loss                                                                 | 23 (5.2%)   | 10 (4.3%)  | 13 (6.2%)  | 0.375 | 0.721 |
| Confusion                                                                   | 12 (2.7%)   | 4 (1.7%)   | 8 (3.8%)   | 0.178 | 0.288 |
| Depression or anxiety                                                       | 42 (9.5%)   | 17 (7.3%)  | 25 (11.8%) | 0.102 | 0.249 |
| Digestive and Other                                                         |             |            |            |       |       |
| ≥1 symptom                                                                  | 82 (18.4%)  | 36 (15.3%) | 46 (21.8%) | 0.078 | 0.137 |
| Diarrhea                                                                    | 13 (2.9%)   | 6 (2.6%)   | 7 (3.3%)   | 0.643 | 0.866 |
| Stomach pain                                                                | 9 (2.0%)    | 4 (1.7%)   | 5 (2.4%)   | 0.626 | 0.955 |
| Nausea with or without vomiting                                             | 10 (2.3%)   | 5 (2.2%)   | 5 (2.4%)   | 0.874 | 0.728 |
| Loss of appetite                                                            | 9 (2.0%)    | 5 (2.2%)   | 4 (1.9%)   | 0.852 | 0.759 |
| Joint or muscle pain                                                        | 33 (7.4%)   | 17 (7.3%)  | 16 (7.6%)  | 0.908 | 0.699 |
| Rash                                                                        | 8 (1.8%)    | 4 (1.7%)   | 4 (1.9%)   | 0.887 | 0.737 |
| Changes in menstrual cycles                                                 | 17 (7.3%)   | 6 (6.1%)   | 11 (8.2%)  | 0.547 | 0.552 |
| Hair loss                                                                   | 22 (5.0%)   | 8 (3.4%)   | 14 (6.6%)  | 0.121 | 0.250 |

<sup>a</sup> *P* values of t-test for number of symptoms, Chi-square tests or Fisher’s exact tests when any one cell has an expected frequency less than 5 for individual symptoms and number of symptom category comparing the BNT162b2 cohort and the unvaccinated cohort

<sup>b</sup> Model-based *P* value

SD=Standard Deviation

Supplemental Table S2. Multivariable Logistic Models for Long COVID <sup>a</sup>

| Patient Characteristics               | Estimate  | Standard Error | P value |
|---------------------------------------|-----------|----------------|---------|
| Intercept                             | -1.27     | 0.34           | <0.001  |
| Vaccination Status                    |           |                |         |
| Bivalent                              | -0.51     | 0.21           | 0.015   |
| Unvaccinated                          | Reference |                |         |
| Assessment Time                       |           |                |         |
| Week 4                                | Reference |                |         |
| Month 3                               | -0.45     | 0.15           | 0.004   |
| Month 6                               | -0.43     | 0.16           | 0.008   |
| Vaccination Status by Assessment Time |           |                |         |
| Bivalent*Month 3                      | 0.28      | 0.22           | 0.203   |
| Bivalent*Month 6                      | -0.01     | 0.24           | 0.955   |
| Age group, years                      |           |                |         |
| 18-29                                 | Reference |                |         |
| 30-49                                 | 0.65      | 0.28           | 0.022   |
| 50-64                                 | 0.96      | 0.31           | 0.002   |
| ≥65                                   | 0.53      | 0.35           | 0.136   |
| Gender                                |           |                |         |
| Male                                  | -0.65     | 0.21           | 0.003   |
| Female                                | Reference |                |         |
| Social Vulnerability Index category   |           |                |         |
| <0.25                                 | Reference |                |         |
| ≥0.25 and <0.5                        | 0.28      | 0.23           | 0.225   |
| ≥0.5 and <0.75                        | -0.04     | 0.27           | 0.895   |
| ≥0.75                                 | 0.76      | 0.29           | 0.009   |

<sup>a</sup> Long COVID was defined as self-reporting 3 or more long-COVID symptoms at the time of assessment.
